# Supplementary material for: Detection of TNP and sulfite ions in an aqueous medium using a pyrazinium-based chemosensor
Source: Royal Society of Chemistry journal article supplement (doi:10.1039/d3sd00345k), 2024-01-01
Supplement: d3sd00345k1.pdf [file d3sd00345k1.pdf]

Electronic Supporting Information (ESI) for

**Detection of TNP and Sulfite Ion in Aqueous Medium by Pyrazinium-based Chemosensor**

Pragya,<sup>a</sup> Krishnan Rangan,<sup>b</sup> Bharti Khungar<sup>a\*</sup>

<sup>a</sup>Department of Chemistry, Birla Institute of Technology and Science Pilani, Pilani Campus,  
Pilani, Rajasthan, 333031, India

<sup>b</sup>Department of Chemistry, Birla Institute of Technology and Science Pilani, Hyderabad  
Campus, Secunderabad, Telangana, 500078, India

*E-mail address:* [bkhungar@pilani.bits-pilani.ac.in](mailto:bkhungar@pilani.bits-pilani.ac.in)

**Table of contents**

Fig. S1 <sup>1</sup>H NMR of **PPyz** in CDCl<sub>3</sub>

Fig. S2 <sup>13</sup>C NMR of **PPyz** in CDCl<sub>3</sub>

Fig. S3 HRMS of **PPyz**

Fig. S4 <sup>1</sup>H NMR of **BPPyz** in DMSO-*d*<sub>6</sub>

Fig. S5 <sup>13</sup>C NMR of **BPPyz** in DMSO-*d*<sub>6</sub>

Fig. S6 HRMS of **BPPyz**

Fig. S7 ORTEP diagram of **BPPyz**

Fig. S8 UV-visible and fluorescence spectra of **BPPyz**

Fig. S9 Solvent study of **BPPyz** ( $2 \times 10^{-5}$  M)

Fig. S10 Individual UV-visible spectra of **BPPyz**, **BPPyz**-TNP and TNP

Fig. S11 Comparison of percentage fluorescence quenching obtained on addition of TNP, 2,4-DNP and 4-NP to the solution of **BPPyz** in water ( $2 \times 10^{-5}$  M)

Fig. S12 Interference study of **BPPyz** toward TNP selectivity in the presence of (a) anions, (b) cations, and (c) organic analytes

Fig. S13 Effect of pH on **BPPyz**, **BPPyz** + TNP and **BPPyz** + SO<sub>3</sub><sup>2-</sup>

Fig. S14 Fluorescence spectra for **BPPyz** ( $2 \times 10^{-5}$  M) with different amounts of 2,4-DNP

Fig. S15 Fluorescence spectra for **BPPyz** ( $2 \times 10^{-5}$  M) with different amounts of 4-NP

Fig. S16 Calibration curve with error bar for calculating Detection Limit of TNP

Fig. S17 Stern-Volmer plot of **BPPyz** using TNP as a quencher ( $2 \times 10^{-5}$  M)

Fig. S18 Stern-Volmer plot of **BPPyz** using 2,4-DNP as a quencher ( $2 \times 10^{-5}$  M)

- Fig. S19 Stern-Volmer plot of **BPPyz** using 4-NP as a quencher ( $2 \times 10^{-5}$  M)
- Fig. S20 Spectral overlap of organic analytes and **BPPyz**
- Fig. S21 Lifetime decay plot of **BPPyz**, **BPPyz-TNP** and **BPPyz-SO<sub>3</sub><sup>2-</sup>** complexes
- Fig. S22 Inner filter effect correction of **BPPyz**
- Fig. S23 Fluorescence spectra of **BPPyz** and **BPPyz** with TFA in aqueous medium
- Fig. S24 <sup>1</sup>H NMR of **BPPyz-TNP** complex DMSO-*d*<sub>6</sub>
- Fig. S25 HRMS of **BPPyz-TNP** complex
- Fig. S26 HOMO-LUMO energy levels of **BPPyz** and organic analytes
- Fig. S27 Stern–Volmer plot of **BPPyz** using SO<sub>3</sub><sup>2-</sup> as a quencher
- Fig. S28 Job’s Plot of **BPPyz** with SO<sub>3</sub><sup>2-</sup>
- Fig. S29 Selectivity of **BPPyz** toward SO<sub>3</sub><sup>2-</sup> in the presence of anions
- Fig. S30 Calibration curve with error bar for calculating Detection Limit of SO<sub>3</sub><sup>2-</sup>
- Fig. S31 <sup>1</sup>H NMR of **BPPyz-SO<sub>3</sub><sup>2-</sup>** complex in DMSO-*d*<sub>6</sub>
- Fig. S32 <sup>13</sup>C NMR of **BPPyz-SO<sub>3</sub><sup>2-</sup>** complex in DMSO-*d*<sub>6</sub>
- Fig. S33 HRMS of **BPPyz-SO<sub>3</sub><sup>2-</sup>** complex
- Fig. S34 Sketch of Photo light box for RGB analysis
- Fig. S35 The ratio of RGB (a) R/(R+G+B) (b) G/(R+G+B) (c) B/(R+G+B) (d) R/G (e) R/B (f) G/B versus SO<sub>3</sub><sup>2-</sup> concentration in the range of 0 to 20.0 μM.

### List of tables

- Table S1 Single-crystal XRD data and structure refinement of **BPPyz** and **BPPyz-TNP** complex
- Table S2 Bond Lengths of **BPPyz**
- Table S3 Bond Angles of **BPPyz**
- Table S4 Bond Lengths of **BPPyz-TNP** complex
- Table S5 Bond Angles of **BPPyz-TNP** complex
- Table S6 A comparison of literature reported Chemosensors for TNP detection.
- Table S7 A comparison of literature reported Chemosensors for SO<sub>3</sub><sup>2-</sup> detection

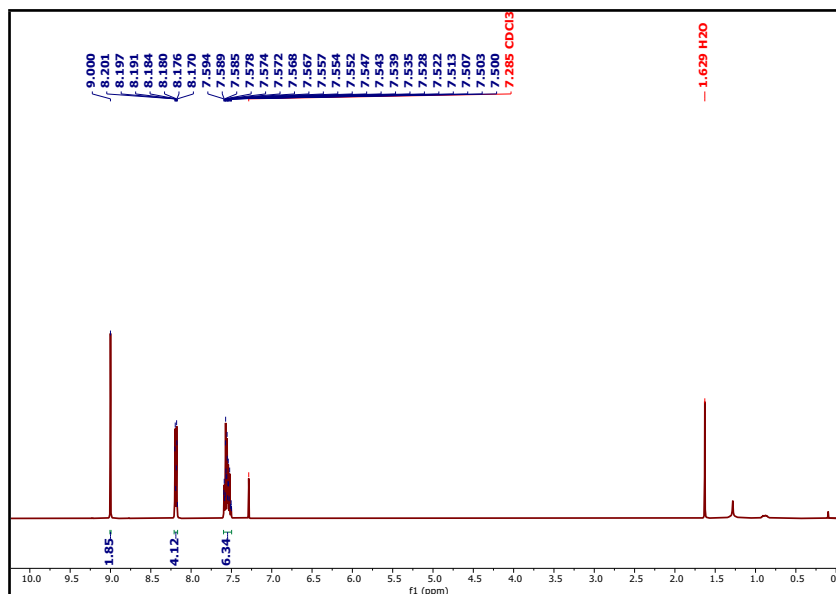

Fig. S1  $^1\text{H}$  NMR of PPyz in  $\text{CDCl}_3$

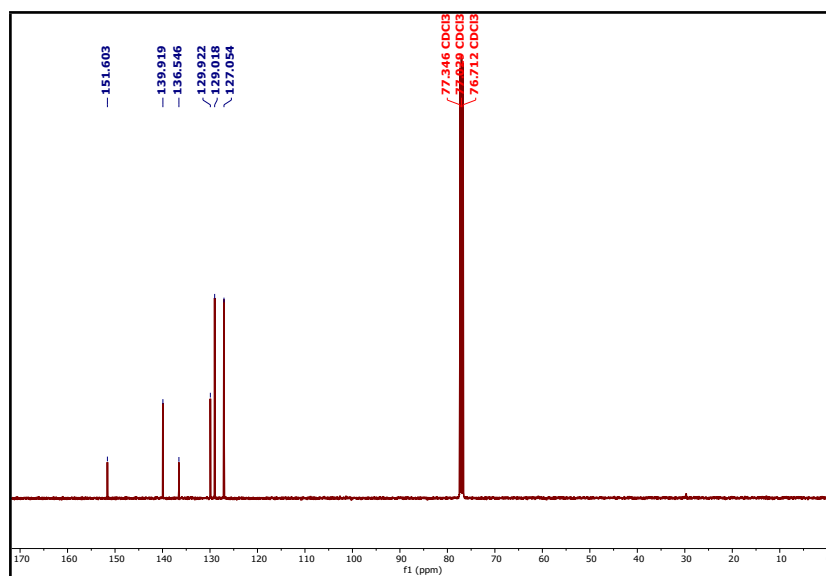

Fig. S2  $^{13}\text{C}$  NMR of PPyz in  $\text{CDCl}_3$

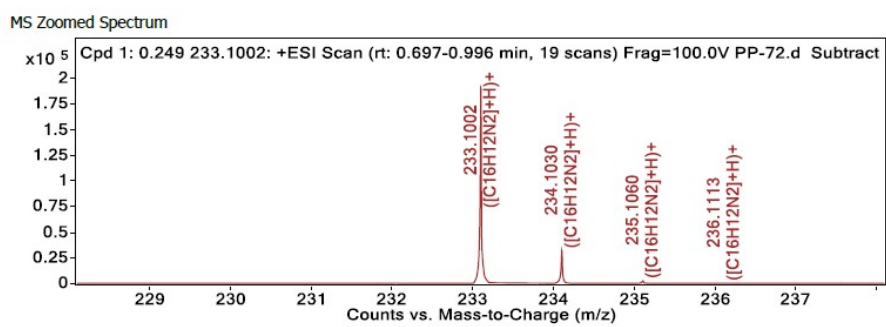

Fig. S3 HRMS of PPyz

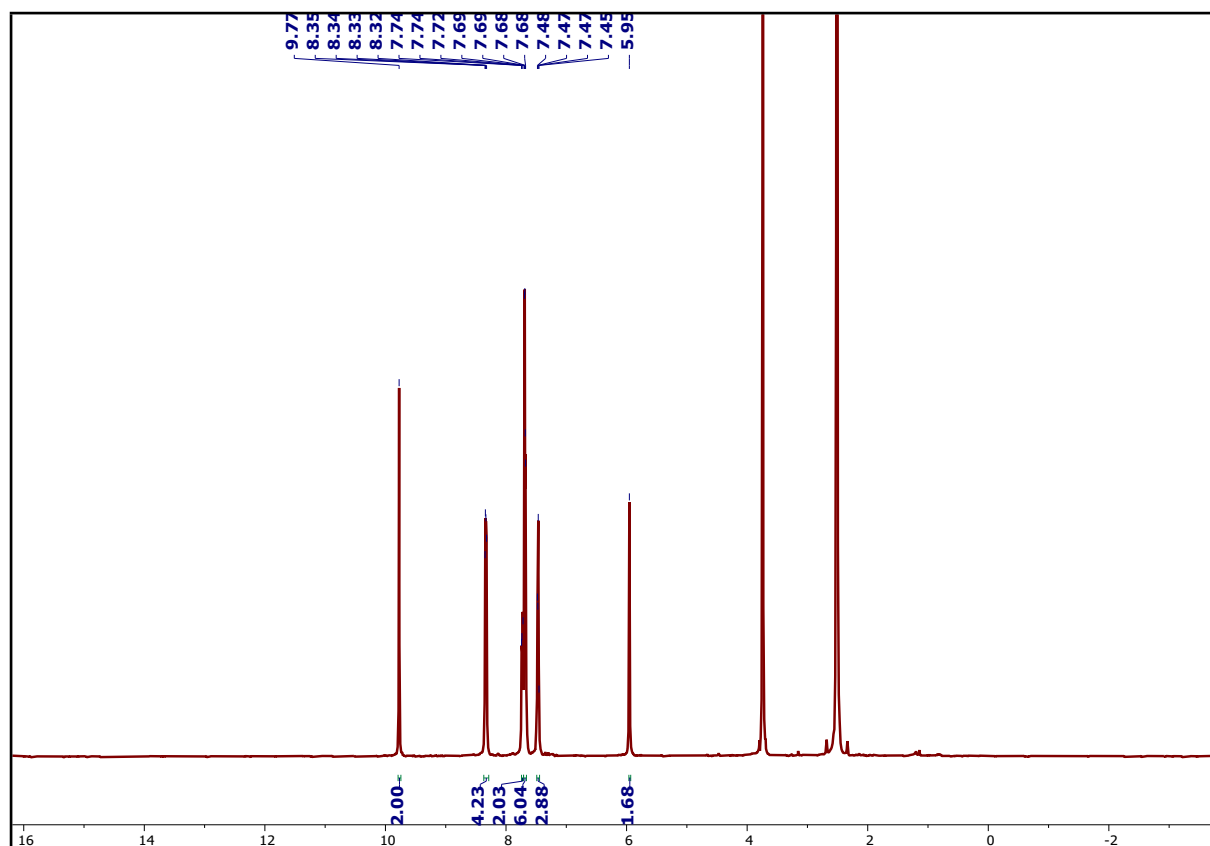

Fig. S4 <sup>1</sup>H NMR of BPPyz in DMSO-*d*<sub>6</sub>

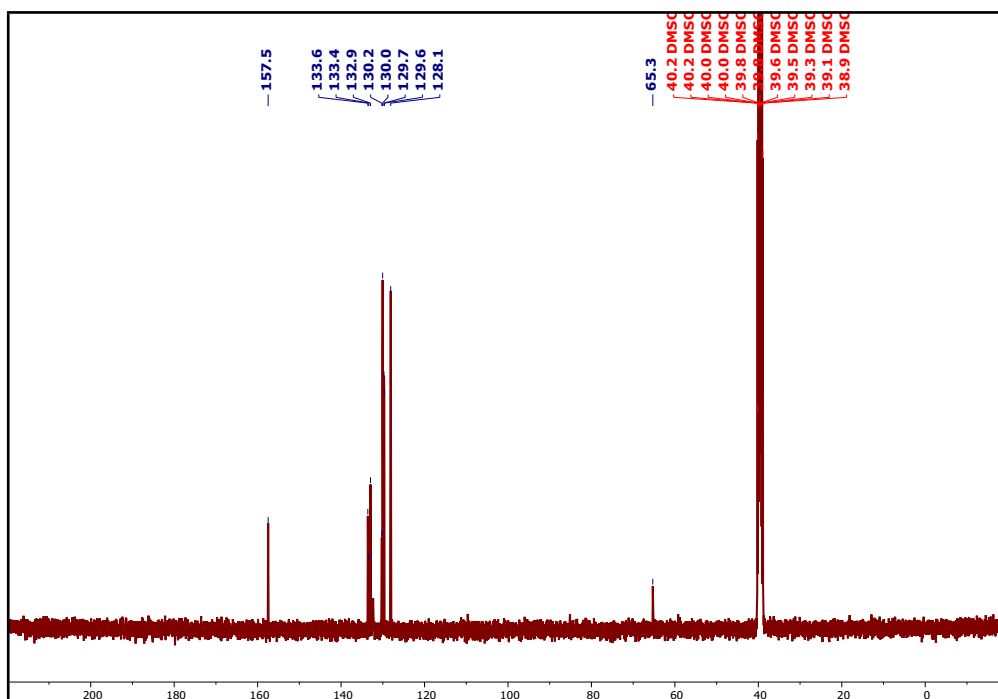

Fig. S5  $^{13}\text{C}$  NMR of **BPPyz** in  $\text{DMSO-}d_6$

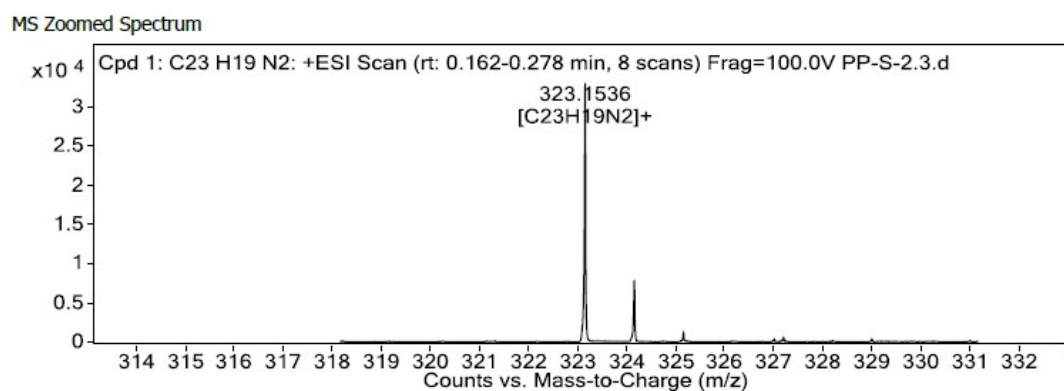

Fig. S6 HRMS of **BPPyz**

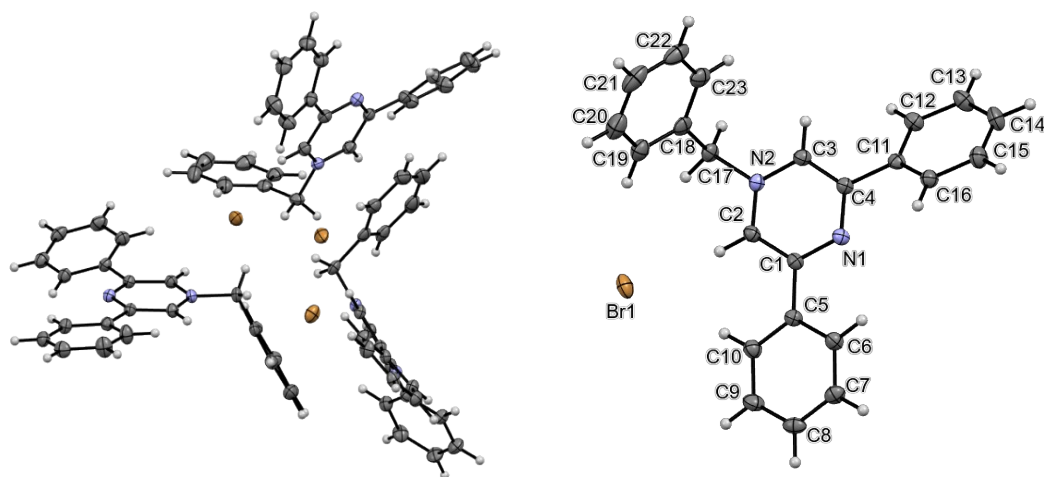

Fig. S7 ORTEP diagram of **BPPyz** three molecules appear in an asymmetric unit, for clarity only labelling is displayed for one of the three molecules. The thermal ellipsoids are drawn at the 50% probability level (CCDC 2189176)

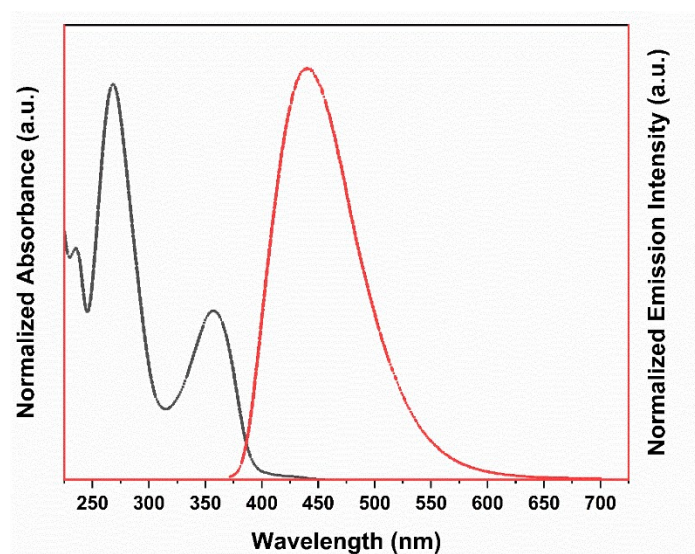

Fig. S8 UV-visible and fluorescence spectra of **BPPyz** ( $2 \times 10^{-5}$  M)

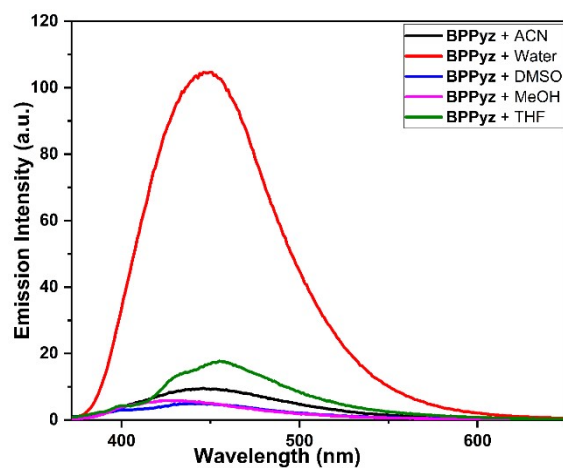

Fig. S9 Solvent study of **BPPyz** ( $2 \times 10^{-5}$  M)

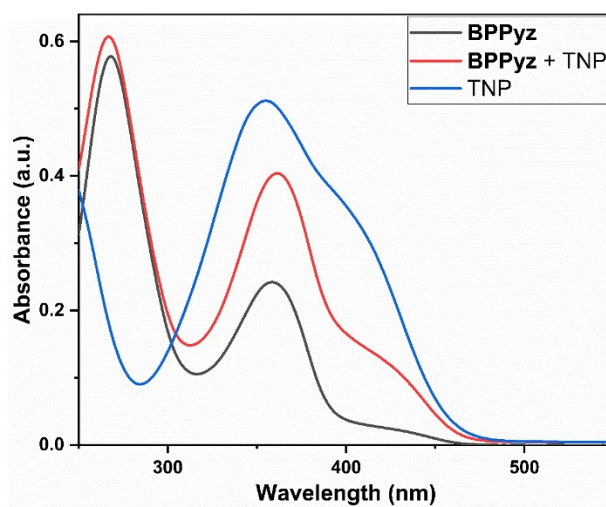

Fig. S10 Individual UV-visible spectra of **BPPyz**, **BPPyz-TNP** and **TNP**

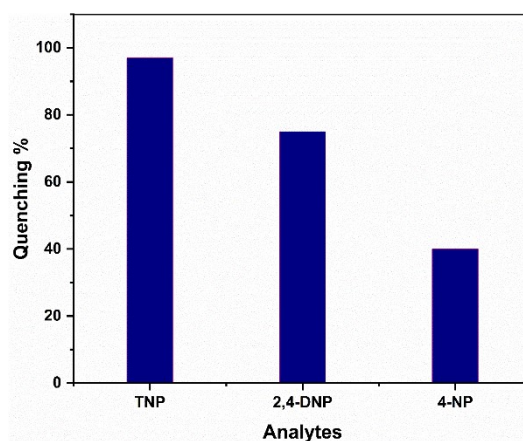

Fig. S11 Comparison of percentage fluorescence quenching obtained on addition of **TNP**, **2,4-DNP** and **4-NP** to the solution of **BPPyz** in water ( $2 \times 10^{-5}$  M)

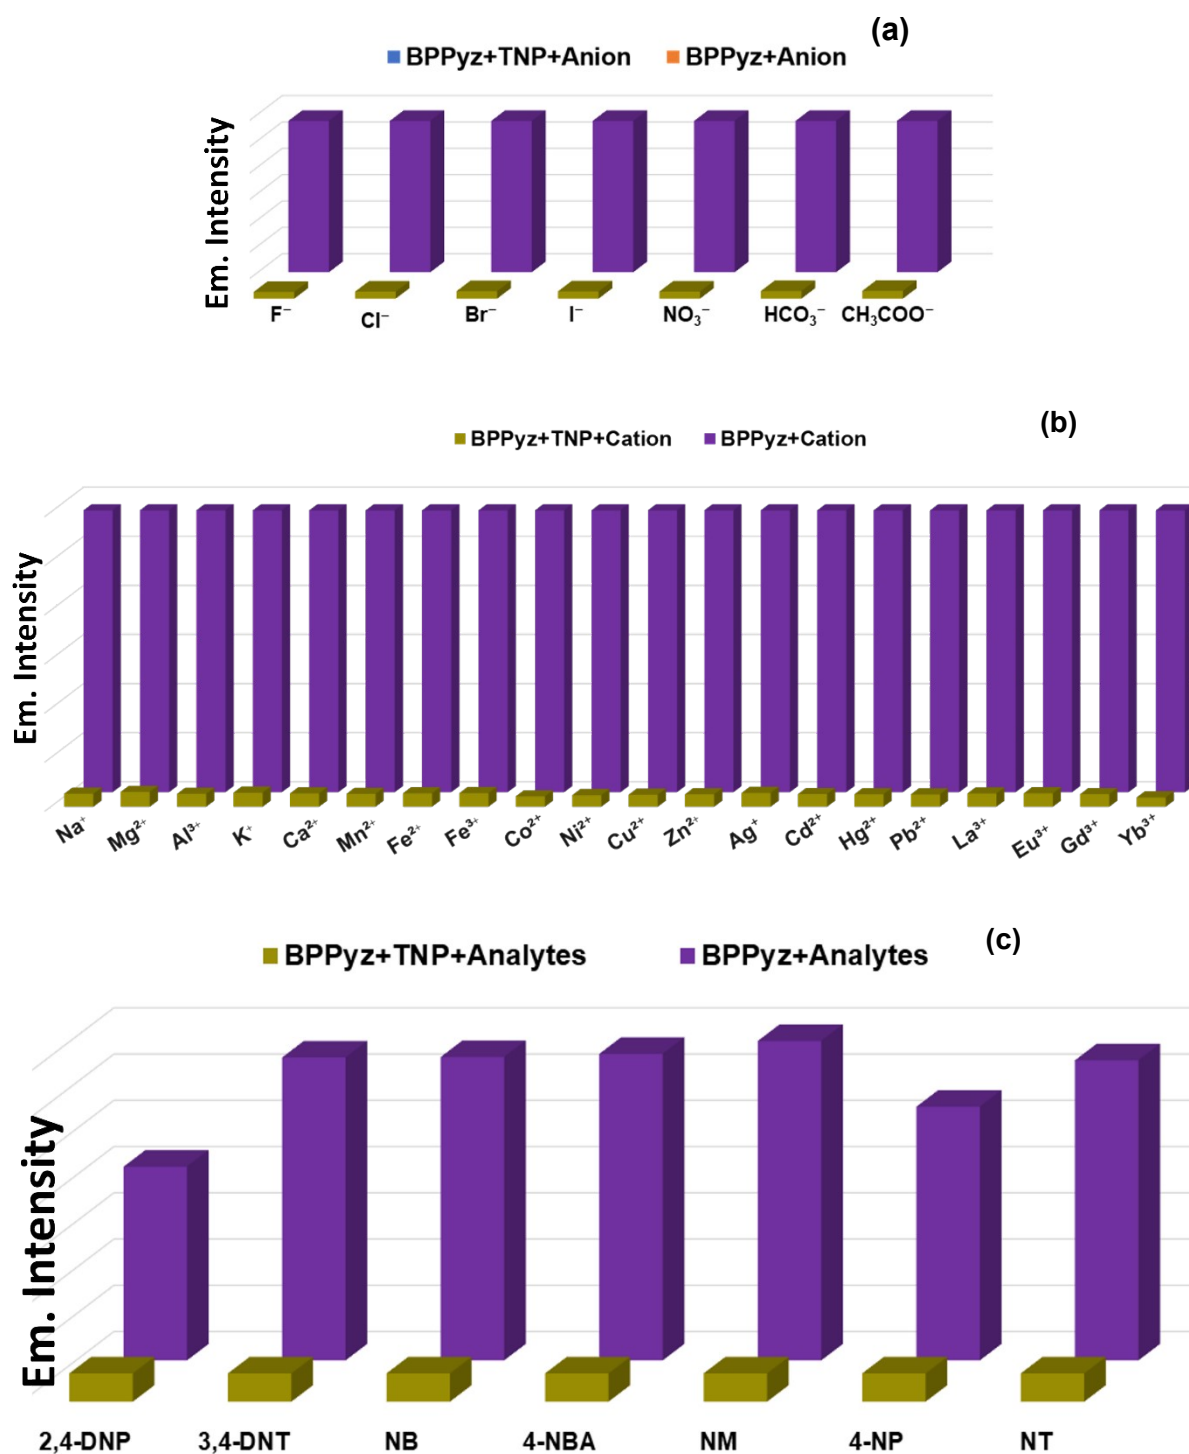

Fig. S12 Interference study of **BPPyz** toward TNP selectivity in the presence of (a) anions, (b) cations, and. (c) organic analytes ( $2 \times 10^{-5}$  M)



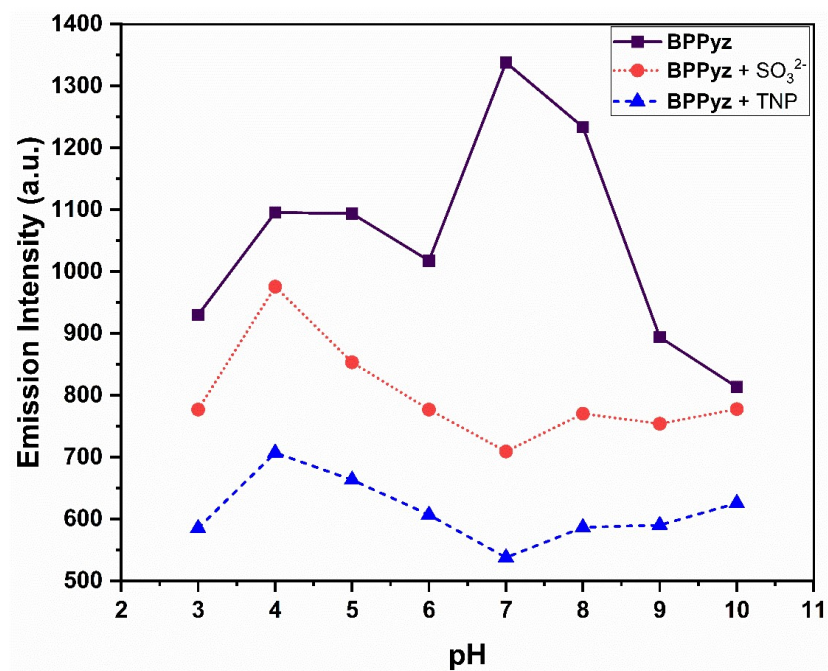

Fig. S13 Effect of pH on **BPPyz**, **BPPyz + TNP** and **BPPyz + SO<sub>3</sub><sup>2-</sup>**

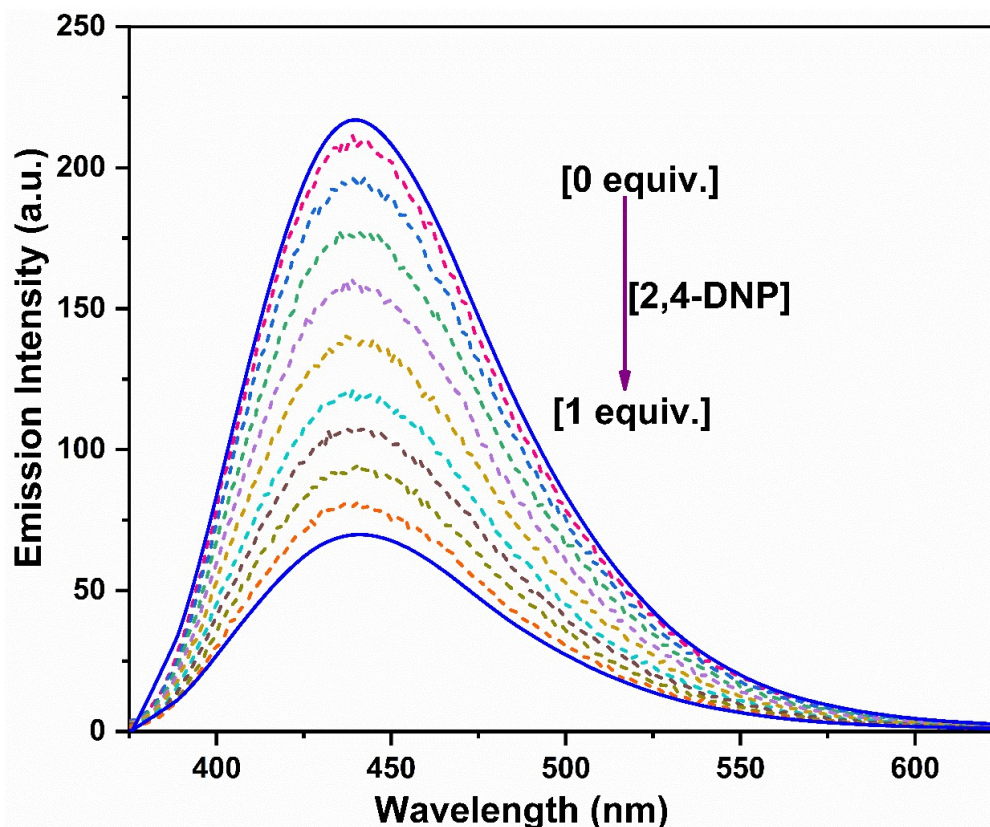

Fig. S14 Fluorescence spectra for **BPPyz** ( $2 \times 10^{-5}$  M) with different amounts of 2,4-DNP

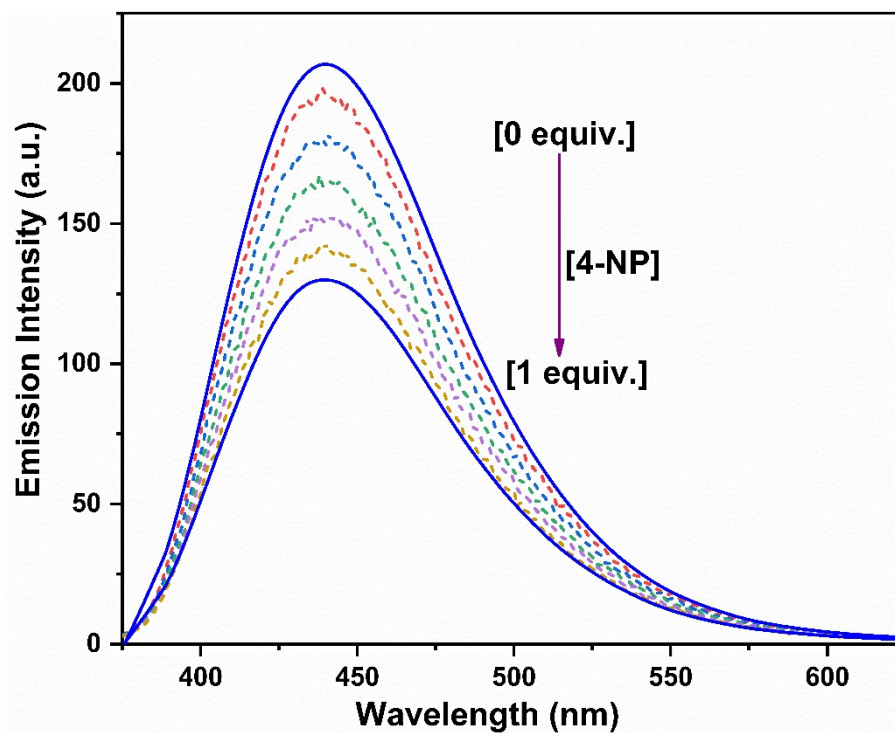

Fig. S15 Fluorescence spectra for **BPPyz** ( $2 \times 10^{-5}$  M) with different amounts of 4-NP

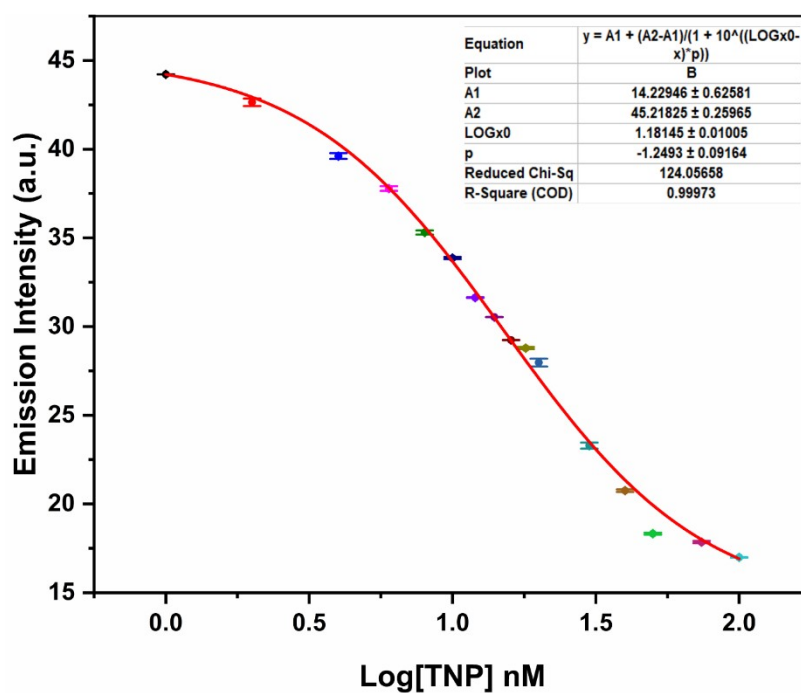

Fig. S16 Calibration curve with error bar for calculating Detection Limit of TNP

## Methods

### Photophysical studies

For photophysical studies, 10 mM stock solutions of **BPPyz** and different analytes (cations, anions and organic analytes) were prepared in Milli-Q water. The stock solutions of 4-nitrotoluene (NT), 3,4-dinitrotoluene (3,4-DNT), and 4-nitrobenzoic acid (NBA) were prepared in UV grade THF.

### Quantum yield calculation<sup>1</sup>

The fluorescence quantum yield was calculated using quinine sulfate as a reference in 0.1 M H<sub>2</sub>SO<sub>4</sub> ( $\Phi_R = 0.54$ ) and calculated using the following equation

$$\Phi_S = \Phi_R \frac{I_S}{I_R} \times \frac{A_R}{A_S} \times \frac{\eta_S^2}{\eta_R^2}$$

Where I = integrated area under the fluorescence curve, A = absorbance at the excitation wavelength,  $\eta$  = refractive index of the medium and  $\Phi$  = fluorescence quantum yield. Subscripts S and R refer to the sample and the reference standard, respectively.

### Fluorescence quenching percentage calculation<sup>2</sup>

The fluorescence quenching percentage was calculated using the equation.

$$\text{Fluorescence quenching \%} = \left(1 - \frac{I}{I_0}\right) \times 100\%$$

Where, I<sub>0</sub> = initial fluorescence intensity in the absence of analyte, I = fluorescence intensity in the presence of analyte.

### Overlap Integral Calculations<sup>3</sup>

Analytes Overlap integral values were calculated using the equation

$$J(\lambda) = \int F_D(\lambda) \varepsilon_A(\lambda) \lambda^4 d\lambda$$

Where  $F_D(\lambda)$  represents the corrected fluorescence intensity of donor in the range of  $\lambda$  to  $\lambda + \Delta\lambda$  with the total intensity normalized to unity.  $\varepsilon_A$  is the molar absorptivity of the acceptor at  $\lambda$  in M<sup>-1</sup> cm<sup>-1</sup>.

The Förster distance R<sub>0</sub> was calculated for **BPPyz**-TNP interaction using the equation

$$R_0 = 0.211 [(J)Q (\eta^{-4})(\kappa^2)]^{1/6}$$

Where J is the degree of spectral overlap between the donor fluorescence spectrum and the acceptor absorption spectrum. Q = 0.30; fluorescence quantum yield of the donor (without acceptor).  $\eta$  is the refractive index of the medium,  $\kappa^2$  (dipole orientation factor) = 0.667.

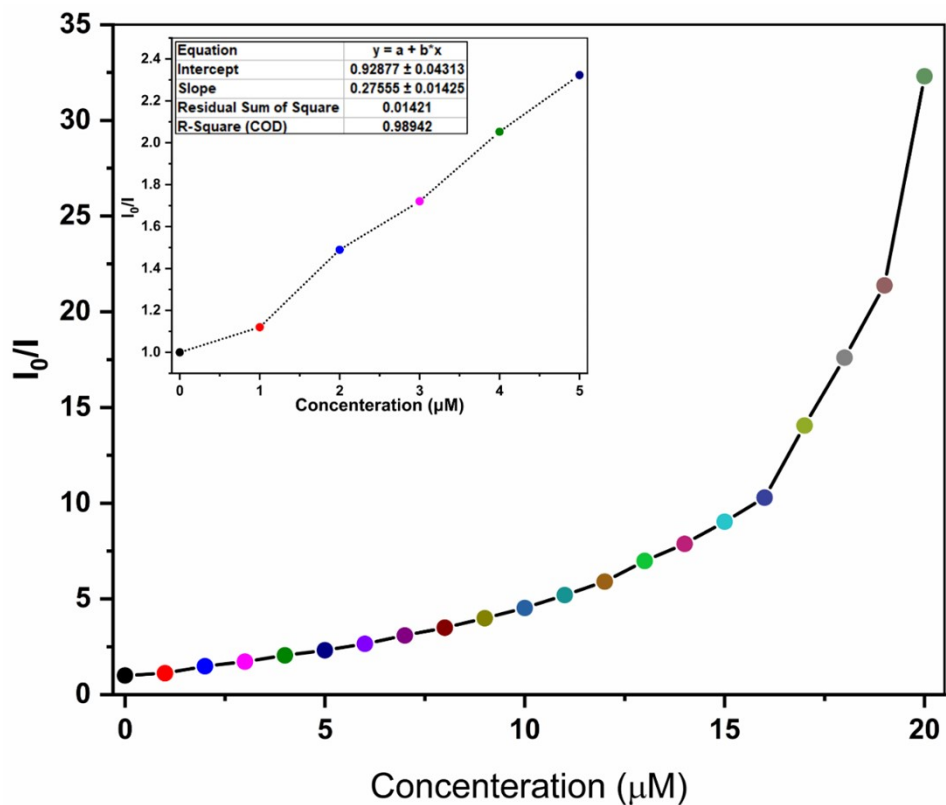

Fig. S17 Stern-Volmer plot of **BPPyz** using TNP as a quencher ( $2 \times 10^{-5}$  M)

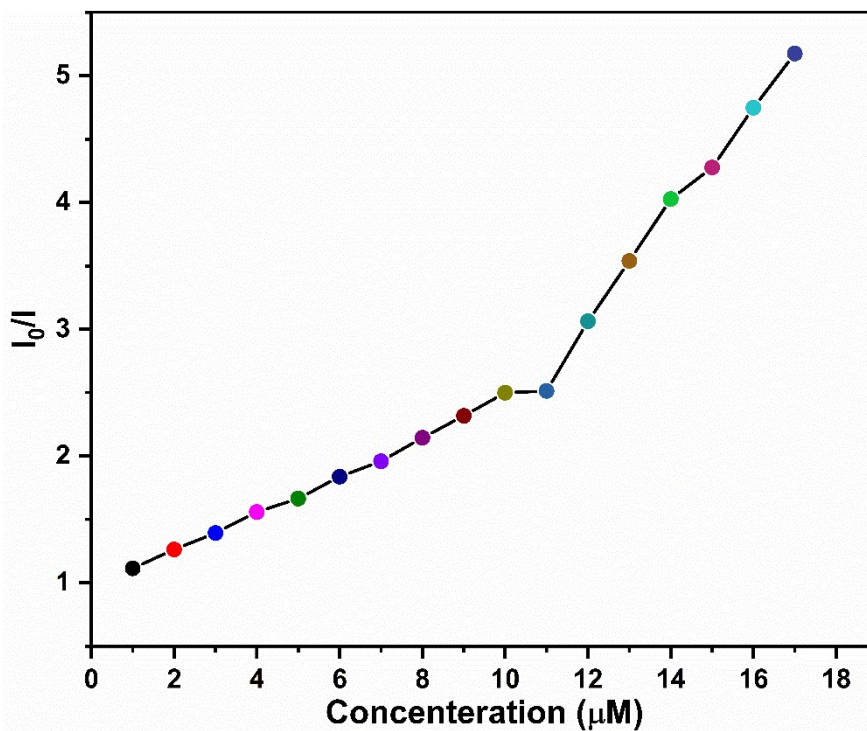

Fig. S18 Stern-Volmer plot of **BPPyz** using 2,4-DNP as a quencher ( $2 \times 10^{-5}$  M)



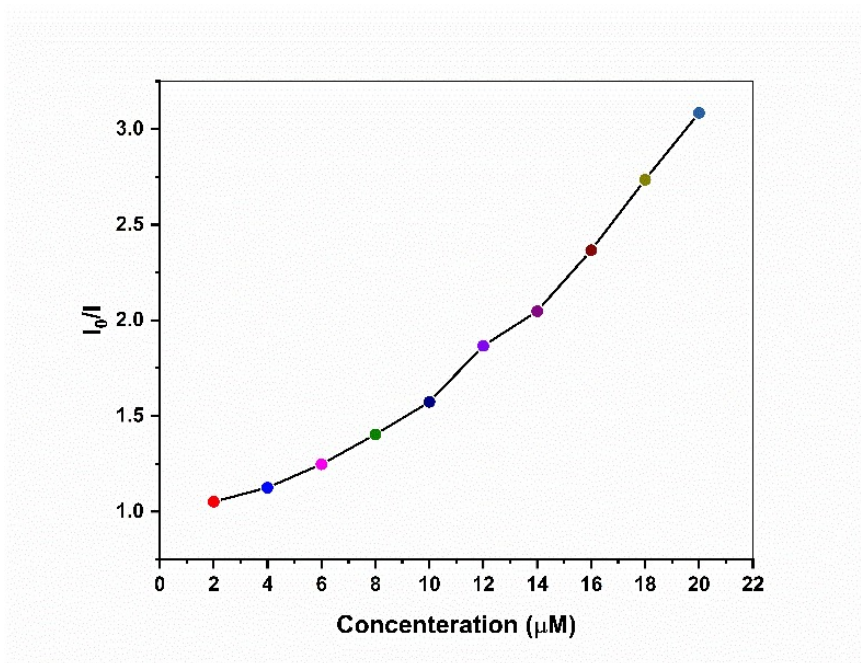

Fig. S19 Stern-Volmer plot of **BPPyz** using 4-NP as a quencher ( $2 \times 10^{-5}$  M)

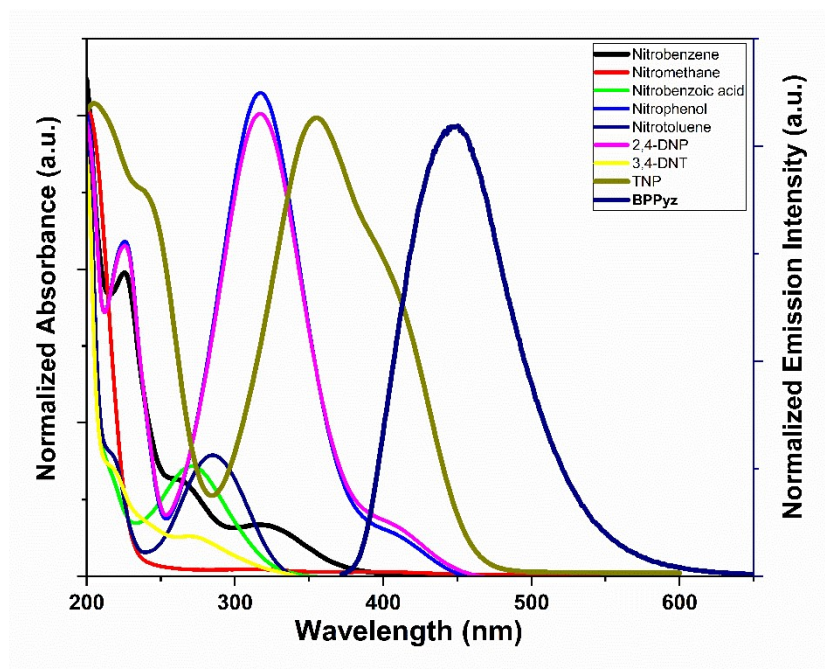

Fig. S20 Spectral overlap of organic analytes and **BPPyz** ( $2 \times 10^{-5}$  M)

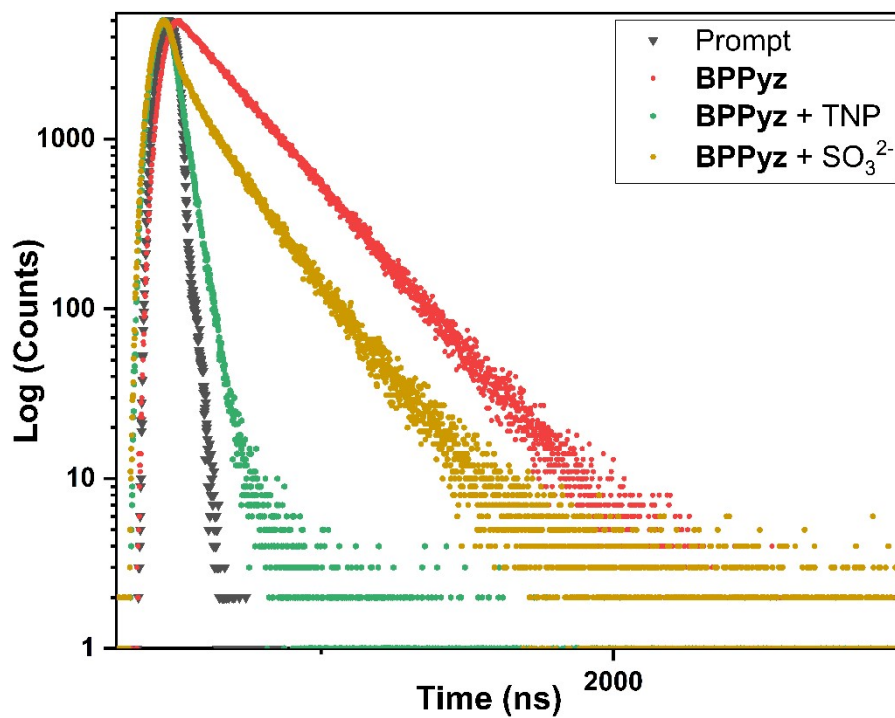

Fig. S21 Lifetime decay Plot of **BPPyz**, **BPPyz-TNP** and **BPPyz-SO<sub>3</sub><sup>2-</sup>** complexes ( $2 \times 10^{-5}$  M)

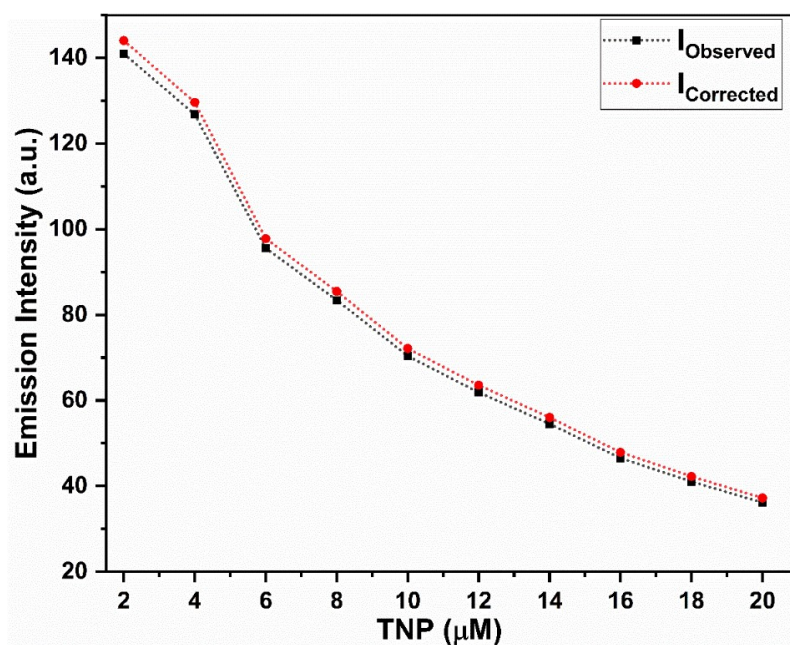

Fig. S22 Inner filter effect correction of **BPPyz** ( $2 \times 10^{-5}$  M)

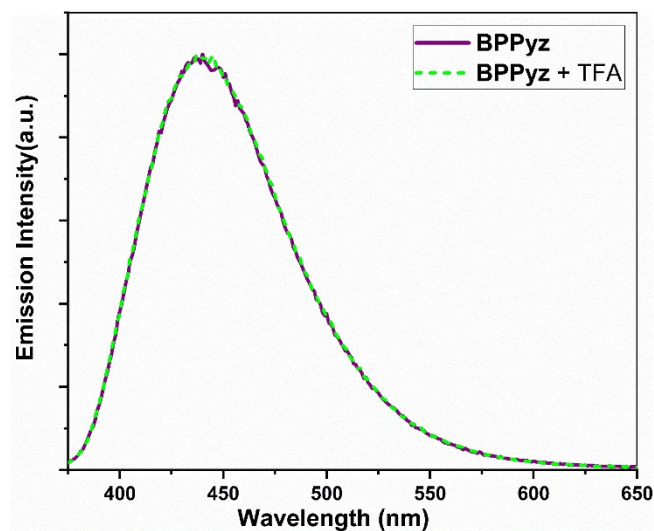

Fig. S23 Fluorescence spectra of **BPPyz** and **BPPyz** with TFA in aqueous medium ( $2 \times 10^{-5}$  M)

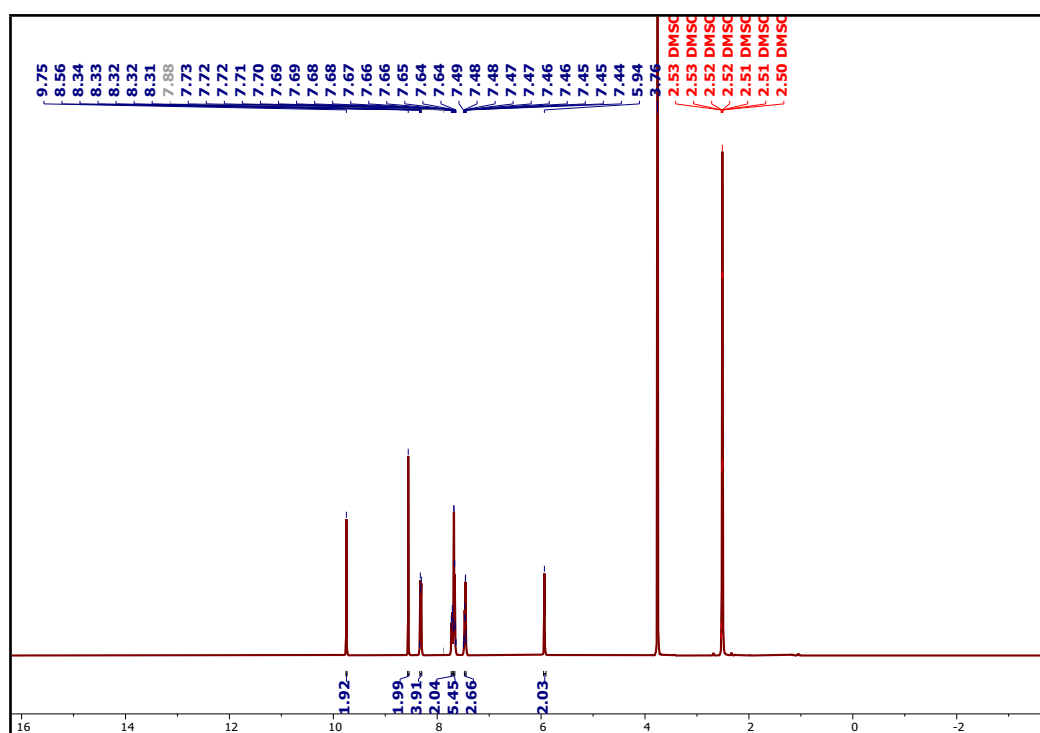

Fig. S24  $^1\text{H}$  NMR of **BPPyz**-TNP complex in  $\text{DMSO-}d_6$

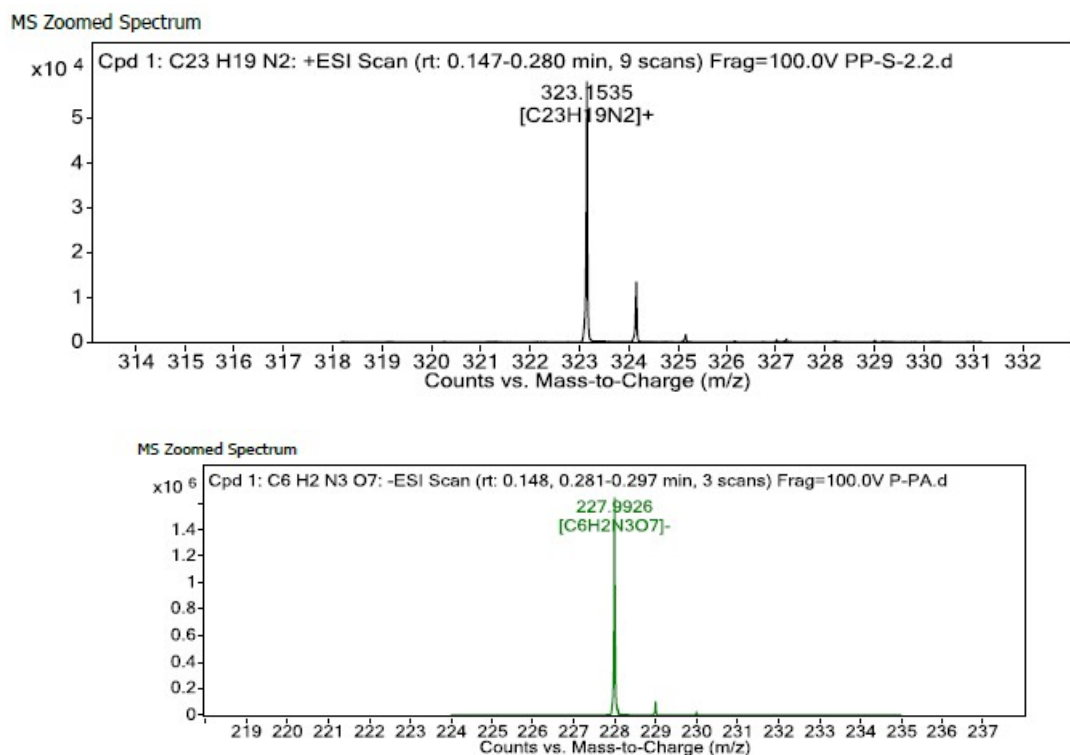

Fig. S25 HRMS of **BPPyz**-TNP complex

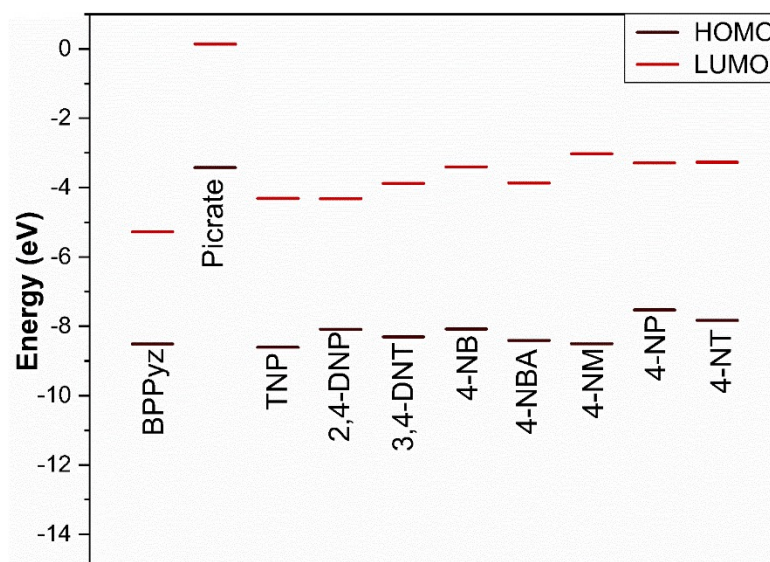

Fig. S26 HOMO-LUMO energy levels of **BPPyz** and organic analytes



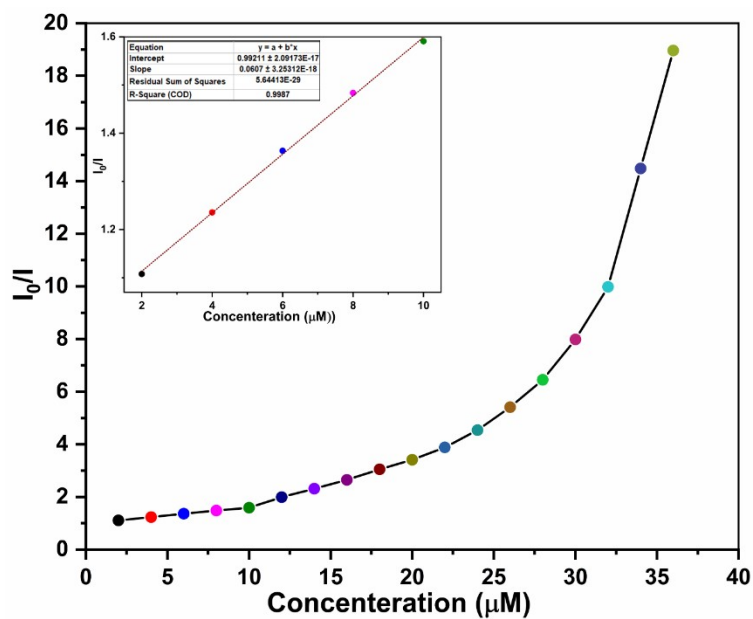

Fig. S27 Stern–Volmer plot of **BPPyz** using  $\text{SO}_3^{2-}$  as a quencher ( $2 \times 10^{-5}$  M)

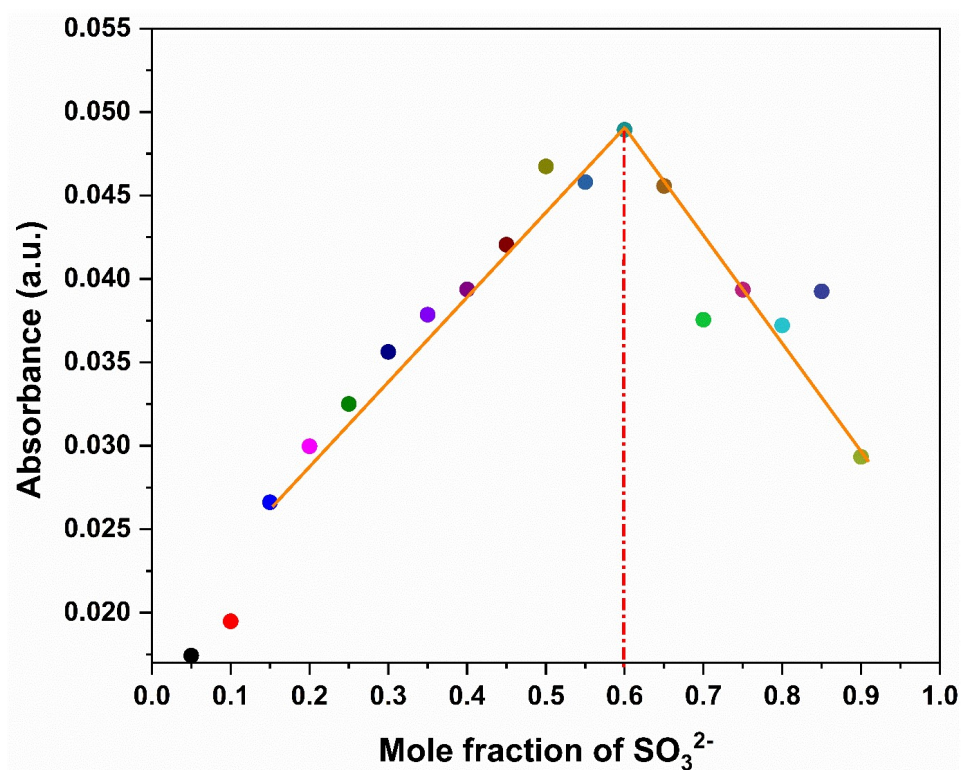

Fig. S28 Job's Plot of **BPPyz** with  $\text{SO}_3^{2-}$  ( $2 \times 10^{-5}$  M)

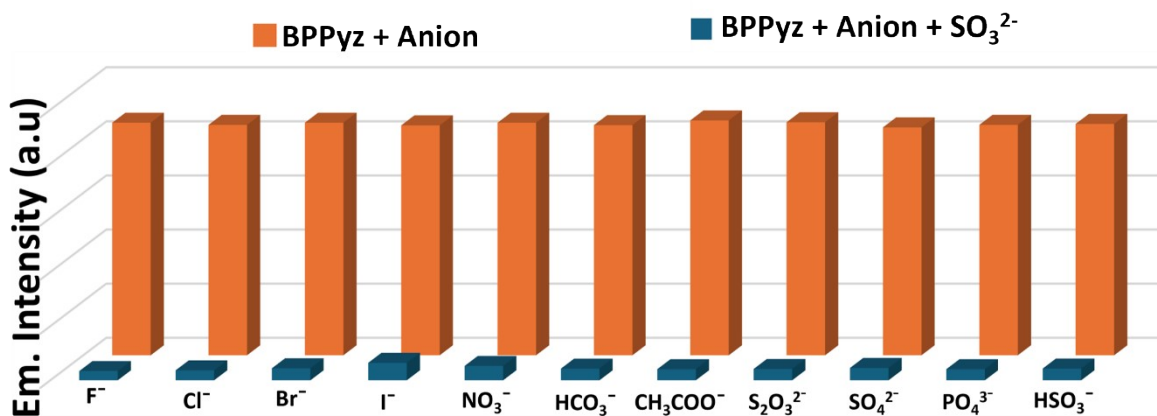

Fig. S29 Selectivity of **BPPyz** toward  $\text{SO}_3^{2-}$  in the presence of anions ( $2 \times 10^{-5}$  M)

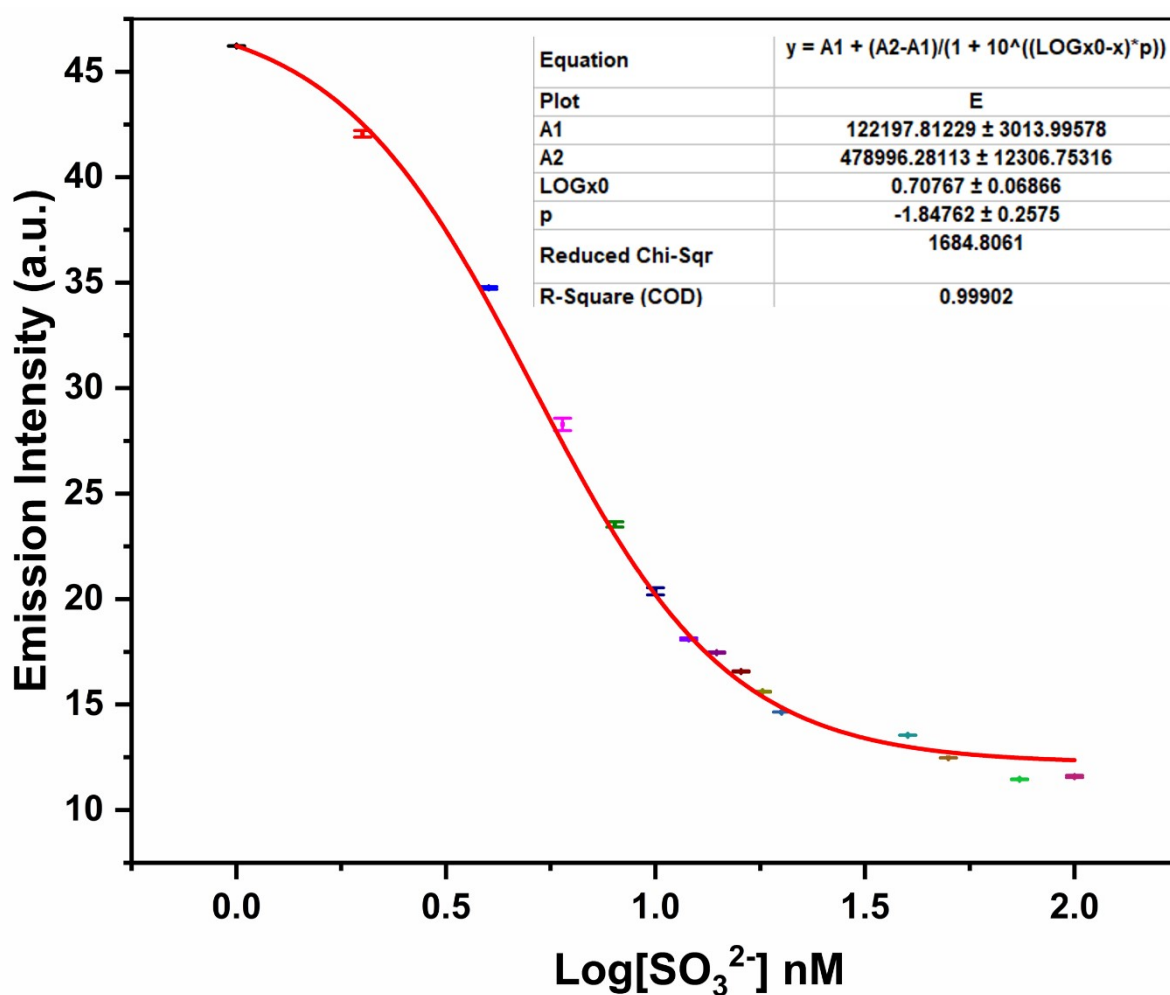

Fig. S30 Calibration curve with error bar for calculating Detection Limit of  $\text{SO}_3^{2-}$

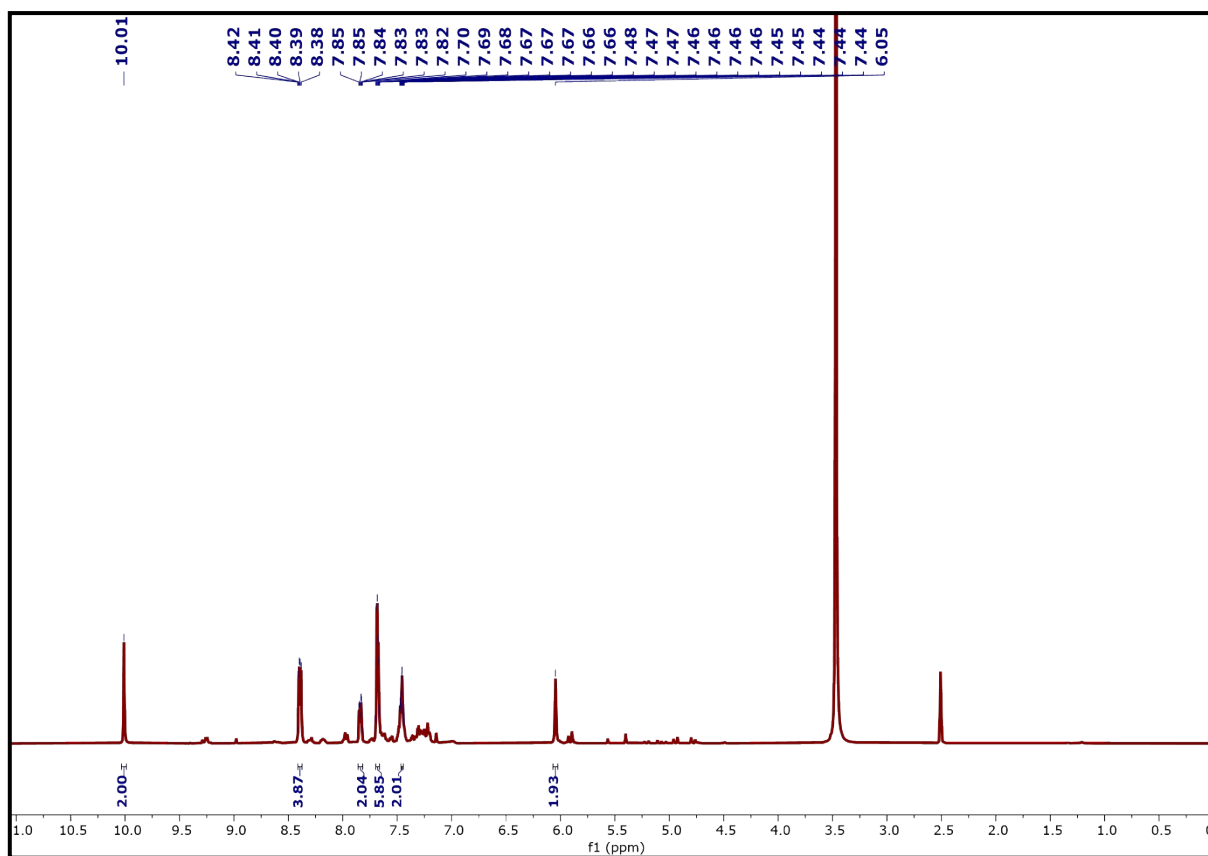

Fig. S31  $^1\text{H}$  NMR of **BPPyz-SO<sub>3</sub><sup>2-</sup>** complex in  $\text{DMSO-}d_6$

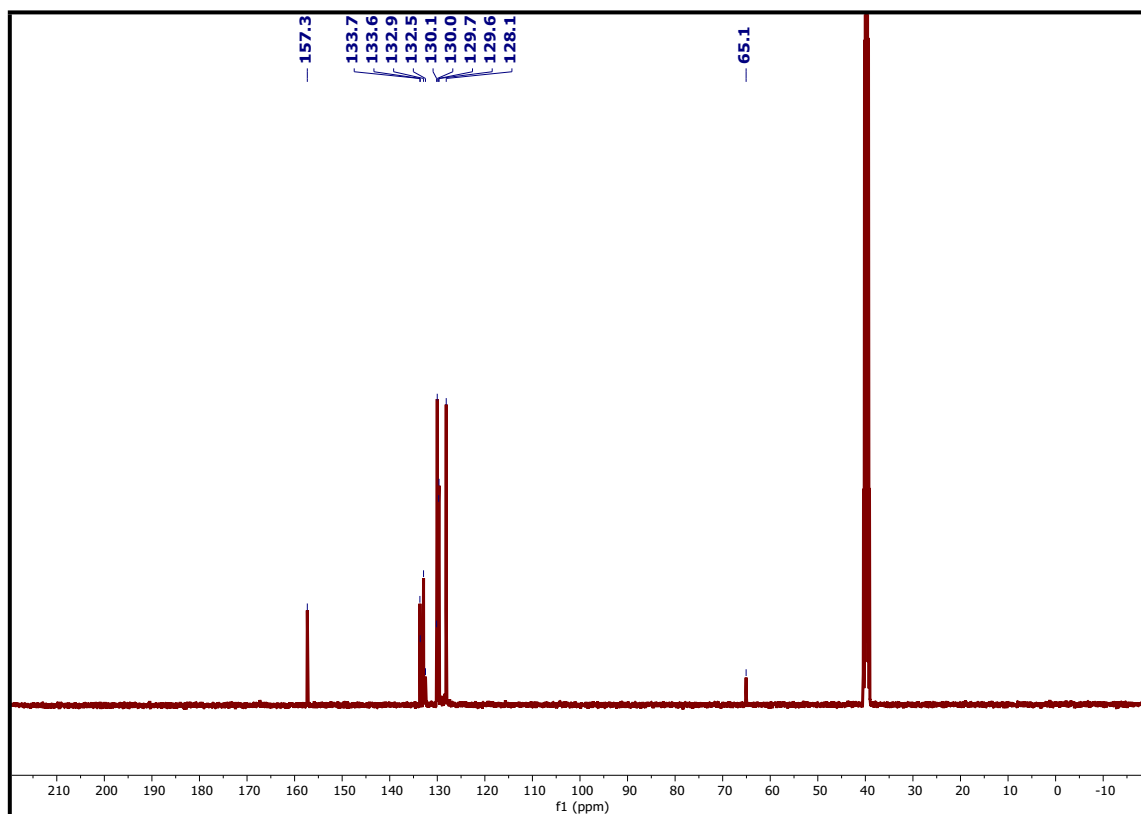

Fig. S32  $^{13}\text{C}$  NMR of **BPPyz-SO<sub>3</sub><sup>2-</sup>** complex in  $\text{DMSO-}d_6$

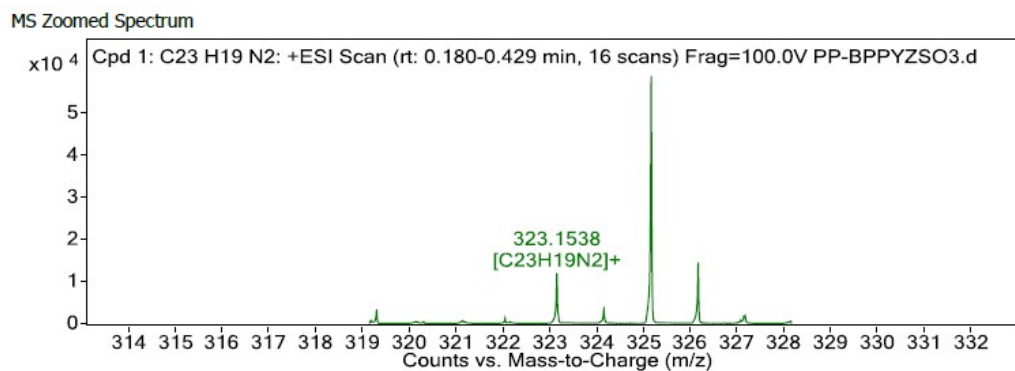

Fig. S33 HRMS of **BPPyz-SO<sub>3</sub><sup>2-</sup>** complex

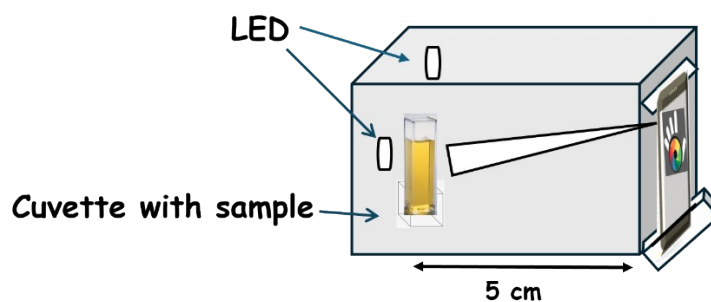

Fig. S34 Sketch of Photo light box for RGB analysis

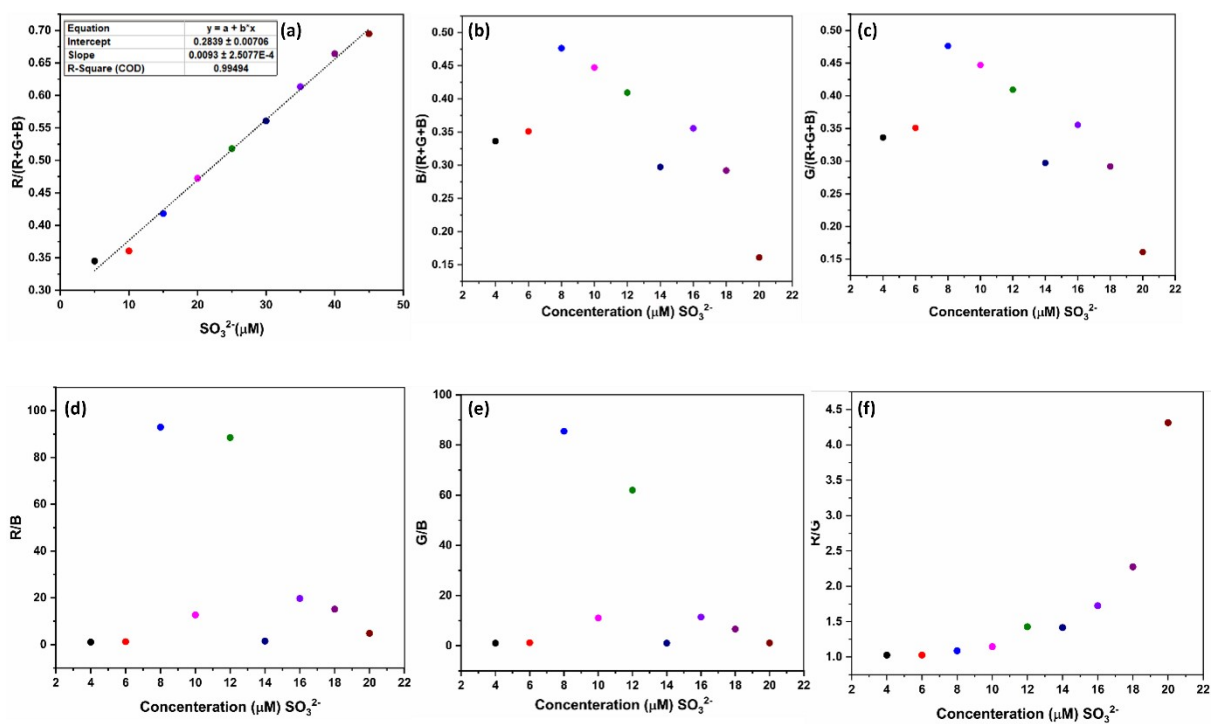

Fig. S35 The ratio of RGB (a)  $R/(R+G+B)$  (b)  $G/(R+G+B)$  (c)  $B/(R+G+B)$  (d)  $R/G$  (e)  $R/B$  (f)  $G/B$  versus  $\text{SO}_3^{2-}$  concentration in the range of 0 to 20.0  $\mu\text{M}$

Table S1. Single-crystal XRD data and structure refinement of **BPPyz** and **BPPyz-TNP** complex

| Identification code                        | <b>BPPyz</b>                                                   | <b>BPPyz-TNP</b>                                              |
|--------------------------------------------|----------------------------------------------------------------|---------------------------------------------------------------|
| Empirical formula                          | C <sub>23</sub> H <sub>19</sub> BrN <sub>2</sub>               | C <sub>29</sub> H <sub>21</sub> N <sub>5</sub> O <sub>7</sub> |
| Formula weight                             | 403.31                                                         | 551.51                                                        |
| Temperature/K                              | 93(2)                                                          | 93(2)                                                         |
| Crystal system                             | monoclinic                                                     | monoclinic                                                    |
| Space group                                | P2 <sub>1</sub> /c                                             | C2/c                                                          |
| a/Å                                        | 23.0173(3)                                                     | 17.3755(2)                                                    |
| b/Å                                        | 10.11520(10)                                                   | 19.6061(2)                                                    |
| c/Å                                        | 26.4430(3)                                                     | 15.0107(2)                                                    |
| α/°                                        | 90                                                             | 90                                                            |
| β/°                                        | 113.4840(10)                                                   | 103.3710(10)                                                  |
| γ/°                                        | 90                                                             | 90                                                            |
| Volume/Å <sup>3</sup>                      | 5646.64(12)                                                    | 4975.02(10)                                                   |
| Z                                          | 12                                                             | 8                                                             |
| ρ <sub>calc</sub> /g/cm <sup>3</sup>       | 1.423                                                          | 1.473                                                         |
| μ/mm <sup>-1</sup>                         | 3.023                                                          | 0.903                                                         |
| F(000)                                     | 2472.0                                                         | 2288.0                                                        |
| Crystal size/mm <sup>3</sup>               | 0.13 × 0.08 × 0.05                                             | 0.14 × 0.12 × 0.1                                             |
| Radiation                                  | Cu Kα (λ = 1.54184)                                            | Cu Kα (λ = 1.54184)                                           |
| 2θ range for data collection/°             | 8.376 to 159.512                                               | 6.904 to 159.878                                              |
| Index ranges                               | -28 ≤ h ≤ 29, -12 ≤ k ≤ 6, -28 ≤ l ≤ 33                        | -11 ≤ h ≤ 21, -24 ≤ k ≤ 24, -18 ≤ l ≤ 19                      |
| Reflections collected                      | 35513                                                          | 15324                                                         |
| Independent reflections                    | 12044 [R <sub>int</sub> = 0.0318, R <sub>sigma</sub> = 0.0322] | 5281 [R <sub>int</sub> = 0.0248, R <sub>sigma</sub> = 0.0244] |
| Data/restraints/parameters                 | 12044/0/703                                                    | 5281/0/371                                                    |
| Goodness-of-fit on F <sup>2</sup>          | 1.076                                                          | 1.058                                                         |
| Final R indexes [I ≥ 2σ (I)]               | R <sub>1</sub> = 0.0361, wR <sub>2</sub> = 0.0999              | R <sub>1</sub> = 0.0557, wR <sub>2</sub> = 0.1389             |
| Final R indexes [all data]                 | R <sub>1</sub> = 0.0383, wR <sub>2</sub> = 0.1014              | R <sub>1</sub> = 0.0592, wR <sub>2</sub> = 0.1412             |
| Largest diff.peak/hole / e Å <sup>-3</sup> | 0.72/-0.71                                                     | 0.70/-0.72                                                    |
| CCDC                                       | 2189176                                                        | 2189177                                                       |

Table S2. Bond Lengths for **BPPyz**

| <b>Atom</b> | <b>Atom</b> | <b>Length/Å</b> | <b>Atom</b> | <b>Atom</b> | <b>Length/Å</b> |
|-------------|-------------|-----------------|-------------|-------------|-----------------|
| N1          | C4          | 1.338(3)        | C8          | C9          | 1.385(3)        |
| N1          | C1          | 1.343(2)        | C7          | C6          | 1.381(3)        |
| N201        | C201        | 1.336(3)        | C219        | C220        | 1.394(3)        |
| N201        | C204        | 1.336(3)        | C311        | C316        | 1.400(3)        |
| N202        | C203        | 1.338(3)        | C311        | C312        | 1.396(3)        |
| N202        | C202        | 1.341(3)        | C211        | C216        | 1.397(3)        |
| N202        | C217        | 1.501(2)        | C211        | C212        | 1.398(3)        |
| N2          | C3          | 1.345(3)        | C18         | C23         | 1.397(3)        |
| N2          | C2          | 1.343(3)        | C18         | C19         | 1.397(3)        |
| N2          | C17         | 1.503(2)        | C223        | C222        | 1.387(3)        |
| N302        | C302        | 1.341(3)        | C208        | C207        | 1.381(3)        |
| N302        | C303        | 1.340(3)        | C208        | C209        | 1.385(3)        |
| N302        | C317        | 1.500(3)        | C216        | C215        | 1.389(3)        |
| N301        | C304        | 1.341(3)        | C305        | C306        | 1.398(3)        |
| N301        | C301        | 1.345(3)        | C305        | C310        | 1.395(3)        |
| C4          | C3          | 1.397(3)        | C23         | C22         | 1.391(3)        |
| C4          | C11         | 1.476(3)        | C306        | C307        | 1.386(3)        |
| C11         | C12         | 1.397(3)        | C13         | C14         | 1.387(3)        |
| C11         | C16         | 1.401(3)        | C222        | C221        | 1.397(3)        |
| C5          | C1          | 1.475(3)        | C221        | C220        | 1.378(4)        |
| C5          | C10         | 1.393(3)        | C15         | C14         | 1.391(3)        |
| C5          | C6          | 1.399(3)        | C318        | C323        | 1.397(3)        |
| C2          | C1          | 1.396(3)        | C318        | C317        | 1.508(3)        |
| C201        | C205        | 1.484(3)        | C318        | C319        | 1.392(3)        |
| C201        | C202        | 1.404(3)        | C212        | C213        | 1.392(3)        |
| C218        | C217        | 1.513(3)        | C210        | C209        | 1.389(3)        |
| C218        | C219        | 1.388(3)        | C307        | C308        | 1.387(3)        |
| C218        | C223        | 1.394(3)        | C215        | C214        | 1.389(3)        |
| C204        | C203        | 1.399(3)        | C323        | C322        | 1.387(3)        |
| C204        | C211        | 1.475(3)        | C316        | C315        | 1.393(3)        |
| C206        | C205        | 1.402(3)        | C214        | C213        | 1.378(3)        |
| C206        | C207        | 1.387(3)        | C313        | C312        | 1.391(3)        |
| C304        | C311        | 1.480(3)        | C313        | C314        | 1.379(4)        |
| C304        | C303        | 1.395(3)        | C22         | C21         | 1.384(4)        |
| C12         | C13         | 1.390(3)        | C308        | C309        | 1.382(4)        |
| C16         | C15         | 1.389(3)        | C19         | C20         | 1.392(3)        |
| C17         | C18         | 1.507(3)        | C314        | C315        | 1.392(3)        |
| C10         | C9          | 1.388(3)        | C310        | C309        | 1.388(3)        |
| C205        | C210        | 1.393(3)        | C319        | C320        | 1.395(4)        |
| C301        | C302        | 1.398(3)        | C322        | C321        | 1.391(4)        |
| C301        | C305        | 1.475(3)        | C20         | C21         | 1.380(4)        |
| C8          | C7          | 1.387(3)        | C320        | C321        | 1.386(5)        |

Table S3. Bond Angles for **BPPyz**

| Atom | Atom | Atom | Angle/°    | Atom | Atom | Atom | Angle/°    |
|------|------|------|------------|------|------|------|------------|
| C4   | N1   | C1   | 118.96(17) | C316 | C311 | C304 | 120.07(19) |
| C201 | N201 | C204 | 119.31(17) | C312 | C311 | C304 | 120.66(19) |
| C203 | N202 | C202 | 121.49(17) | C312 | C311 | C316 | 119.27(19) |
| C203 | N202 | C217 | 118.69(17) | C7   | C6   | C5   | 120.35(19) |
| C202 | N202 | C217 | 119.79(17) | C216 | C211 | C204 | 118.78(18) |
| C3   | N2   | C17  | 119.51(16) | C212 | C211 | C204 | 121.37(19) |
| C2   | N2   | C3   | 121.09(17) | C212 | C211 | C216 | 119.84(19) |
| C2   | N2   | C17  | 119.40(16) | C23  | C18  | C17  | 120.2(2)   |
| C302 | N302 | C317 | 119.61(17) | C23  | C18  | C19  | 119.8(2)   |
| C303 | N302 | C302 | 121.10(18) | C19  | C18  | C17  | 120.0(2)   |
| C303 | N302 | C317 | 119.29(17) | C8   | C9   | C10  | 120.7(2)   |
| C304 | N301 | C301 | 118.59(18) | C222 | C223 | C218 | 120.2(2)   |
| N1   | C4   | C3   | 121.30(18) | N302 | C303 | C304 | 119.10(19) |
| N1   | C4   | C11  | 116.95(17) | C207 | C208 | C209 | 119.6(2)   |
| C3   | C4   | C11  | 121.74(17) | C215 | C216 | C211 | 119.7(2)   |
| N2   | C3   | C4   | 118.67(18) | C306 | C305 | C301 | 119.40(19) |
| C12  | C11  | C4   | 120.75(18) | C310 | C305 | C301 | 121.06(19) |
| C12  | C11  | C16  | 119.66(19) | C310 | C305 | C306 | 119.5(2)   |
| C16  | C11  | C4   | 119.57(18) | C22  | C23  | C18  | 120.0(2)   |
| C10  | C5   | C1   | 121.51(18) | C307 | C306 | C305 | 120.2(2)   |
| C10  | C5   | C6   | 119.28(18) | C14  | C13  | C12  | 120.4(2)   |
| C6   | C5   | C1   | 119.18(17) | C223 | C222 | C221 | 119.7(2)   |
| N2   | C2   | C1   | 118.96(17) | C220 | C221 | C222 | 120.1(2)   |
| N1   | C1   | C5   | 117.08(17) | C16  | C15  | C14  | 119.8(2)   |
| N1   | C1   | C2   | 121.00(18) | C323 | C318 | C317 | 120.1(2)   |
| C2   | C1   | C5   | 121.91(17) | C319 | C318 | C323 | 119.8(2)   |
| N201 | C201 | C205 | 117.81(17) | C319 | C318 | C317 | 120.1(2)   |
| N201 | C201 | C202 | 120.88(18) | C221 | C220 | C219 | 120.2(2)   |
| C202 | C201 | C205 | 121.31(18) | C208 | C207 | C206 | 120.5(2)   |
| C219 | C218 | C217 | 119.62(19) | C213 | C212 | C211 | 119.6(2)   |
| C219 | C218 | C223 | 119.8(2)   | C209 | C210 | C205 | 120.0(2)   |
| C223 | C218 | C217 | 120.45(19) | C306 | C307 | C308 | 119.9(2)   |
| N201 | C204 | C203 | 121.06(18) | C216 | C215 | C214 | 120.3(2)   |
| N201 | C204 | C211 | 118.23(17) | C322 | C323 | C318 | 120.5(2)   |
| C203 | C204 | C211 | 120.68(18) | N302 | C317 | C318 | 110.49(16) |
| C207 | C206 | C205 | 120.1(2)   | C315 | C316 | C311 | 120.2(2)   |
| N202 | C203 | C204 | 118.67(18) | C213 | C214 | C215 | 120.1(2)   |
| N301 | C304 | C311 | 118.98(18) | C314 | C313 | C312 | 120.6(2)   |
| N301 | C304 | C303 | 121.18(19) | C208 | C209 | C210 | 120.7(2)   |
| C303 | C304 | C311 | 119.80(18) | C313 | C312 | C311 | 120.0(2)   |
| C13  | C12  | C11  | 119.7(2)   | C13  | C14  | C15  | 120.2(2)   |
| C15  | C16  | C11  | 120.2(2)   | C21  | C22  | C23  | 120.0(2)   |

|      |      |      |            |      |      |      |          |
|------|------|------|------------|------|------|------|----------|
| N2   | C17  | C18  | 110.21(16) | C309 | C308 | C307 | 120.2(2) |
| C9   | C10  | C5   | 119.8(2)   | C214 | C213 | C212 | 120.4(2) |
| C206 | C205 | C201 | 119.21(18) | C20  | C19  | C18  | 119.4(2) |
| C210 | C205 | C201 | 121.68(18) | C313 | C314 | C315 | 120.0(2) |
| C210 | C205 | C206 | 119.10(19) | C314 | C315 | C316 | 119.9(2) |
| N202 | C202 | C201 | 118.58(18) | C309 | C310 | C305 | 119.8(2) |
| N202 | C217 | C218 | 112.06(16) | C308 | C309 | C310 | 120.4(2) |
| N301 | C301 | C302 | 121.28(18) | C318 | C319 | C320 | 119.6(3) |
| N301 | C301 | C305 | 118.83(18) | C323 | C322 | C321 | 119.5(3) |
| C302 | C301 | C305 | 119.88(19) | C21  | C20  | C19  | 120.6(3) |
| N302 | C302 | C301 | 118.74(19) | C20  | C21  | C22  | 120.3(2) |
| C9   | C8   | C7   | 119.6(2)   | C321 | C320 | C319 | 120.1(3) |
| C6   | C7   | C8   | 120.3(2)   | C320 | C321 | C322 | 120.5(3) |
| C218 | C219 | C220 | 119.9(2)   |      |      |      |          |

Table S4. Bond Lengths for **BPPyz-TNP** complex

| Atom | Atom | Length/Å | Atom | Atom | Length/Å |
|------|------|----------|------|------|----------|
| O1   | C24  | 1.239(2) | C7   | C8   | 1.389(3) |
| O2   | N3   | 1.185(3) | C8   | C9   | 1.384(3) |
| O3   | N3   | 1.206(3) | C9   | C10  | 1.387(3) |
| O4   | N4   | 1.231(3) | C11  | C12  | 1.396(3) |
| O5   | N4   | 1.237(3) | C11  | C16  | 1.401(3) |
| O6   | N5   | 1.234(2) | C12  | C13  | 1.385(3) |
| O7   | N5   | 1.222(2) | C13  | C14  | 1.388(3) |
| N1   | C1   | 1.341(2) | C14  | C15  | 1.386(3) |
| N1   | C4   | 1.340(2) | C15  | C16  | 1.385(3) |
| N2   | C2   | 1.343(2) | C17  | C18  | 1.506(3) |
| N2   | C3   | 1.338(2) | C18  | C19  | 1.382(3) |
| N2   | C17  | 1.502(2) | C18  | C23  | 1.391(3) |
| N3   | C25  | 1.455(3) | C19  | C20  | 1.393(3) |
| N4   | C27  | 1.439(3) | C20  | C21  | 1.369(4) |
| N5   | C29  | 1.453(2) | C21  | C22  | 1.385(3) |
| C1   | C2   | 1.396(2) | C22  | C23  | 1.387(3) |
| C1   | C5   | 1.479(2) | C24  | C25  | 1.464(2) |
| C3   | C4   | 1.401(2) | C24  | C29  | 1.457(2) |
| C4   | C11  | 1.477(2) | C25  | C26  | 1.373(3) |
| C5   | C6   | 1.397(3) | C26  | C27  | 1.378(3) |
| C5   | C10  | 1.397(3) | C27  | C28  | 1.392(3) |
| C6   | C7   | 1.384(3) | C28  | C29  | 1.365(3) |



Table S5. Bond Angles for **BPPyz**-TNP complex

| Atom | Atom | Atom | Angle/°    | Atom | Atom | Atom | Angle/°    |
|------|------|------|------------|------|------|------|------------|
| C4   | N1   | C1   | 119.95(15) | C12  | C11  | C16  | 118.95(17) |
| C2   | N2   | C17  | 119.01(15) | C16  | C11  | C4   | 119.86(17) |
| C3   | N2   | C2   | 121.75(15) | C13  | C12  | C11  | 120.47(18) |
| C3   | N2   | C17  | 119.21(16) | C12  | C13  | C14  | 120.26(19) |
| O2   | N3   | O3   | 121.6(2)   | C15  | C14  | C13  | 119.68(19) |
| O2   | N3   | C25  | 120.0(2)   | C16  | C15  | C14  | 120.51(19) |
| O3   | N3   | C25  | 118.3(2)   | C15  | C16  | C11  | 120.12(19) |
| O4   | N4   | O5   | 123.3(2)   | N2   | C17  | C18  | 110.26(15) |
| O4   | N4   | C27  | 119.1(2)   | C19  | C18  | C17  | 120.76(19) |
| O5   | N4   | C27  | 117.5(2)   | C19  | C18  | C23  | 119.30(19) |
| O6   | N5   | C29  | 117.68(17) | C23  | C18  | C17  | 119.94(18) |
| O7   | N5   | O6   | 123.56(18) | C18  | C19  | C20  | 120.1(2)   |
| O7   | N5   | C29  | 118.75(16) | C21  | C20  | C19  | 120.5(2)   |
| N1   | C1   | C2   | 120.34(17) | C20  | C21  | C22  | 119.8(2)   |
| N1   | C1   | C5   | 117.69(15) | C21  | C22  | C23  | 120.1(2)   |
| C2   | C1   | C5   | 121.96(16) | C22  | C23  | C18  | 120.1(2)   |
| N2   | C2   | C1   | 118.83(16) | O1   | C24  | C25  | 125.18(17) |
| N2   | C3   | C4   | 118.54(17) | O1   | C24  | C29  | 123.70(16) |
| N1   | C4   | C3   | 120.57(16) | C29  | C24  | C25  | 111.00(15) |
| N1   | C4   | C11  | 117.81(15) | N3   | C25  | C24  | 119.47(17) |
| C3   | C4   | C11  | 121.62(16) | C26  | C25  | N3   | 116.37(18) |
| C6   | C5   | C1   | 119.23(17) | C26  | C25  | C24  | 124.16(18) |
| C10  | C5   | C1   | 121.85(16) | C25  | C26  | C27  | 119.47(18) |
| C10  | C5   | C6   | 118.92(17) | C26  | C27  | N4   | 119.3(2)   |
| C7   | C6   | C5   | 120.37(18) | C26  | C27  | C28  | 121.22(18) |
| C6   | C7   | C8   | 120.18(19) | C28  | C27  | N4   | 119.5(2)   |
| C9   | C8   | C7   | 119.97(19) | C29  | C28  | C27  | 119.01(18) |
| C8   | C9   | C10  | 120.07(19) | N5   | C29  | C24  | 118.61(15) |
| C9   | C10  | C5   | 120.46(18) | C28  | C29  | N5   | 116.60(16) |

Table S6: A comparison of literature reported Chemosensors for TNP detection

| S.No. | Publication                                                                   | Material used                         | Detection Limit               | Stern-Volmer constant             |
|-------|-------------------------------------------------------------------------------|---------------------------------------|-------------------------------|-----------------------------------|
| 1     | Present Study                                                                 | Pyrazinium-based                      | 9 nM                          | $4.12 \times 10^5 \text{ M}^{-1}$ |
| 2     | <i>Ind. Eng. Chem. Res</i> , 2021, <b>60</b> , 7987–7997                      | Triazine-based                        | 209 nM                        | 1.02 mM                           |
| 3     | <i>ACS Appl.Mater.Interfaces</i> , 2015, <b>7</b> , 10491–10500               | Benzimidazolium-based                 | $5 \times 10^{-13} \text{ M}$ | $4.8 \times 10^5 \text{ M}^{-1}$  |
| 4     | <i>Sens.Actuators B Chem.</i> , 2016, <b>231</b> , 293–301                    | Imidazolium-based                     | 10 nM                         | $1.01 \times 10^6 \text{ M}^{-1}$ |
| 5     | <i>Chemosphere</i> , 2022, <b>2</b> 131825                                    | Benzimidazolium-based                 | 282 nM                        | $2.32 \times 10^6 \text{ M}^{-1}$ |
| 6     | <i>ACS Appl. Mater. Interfaces</i> , 2016, <b>8</b> , <b>38</b> , 25326–25336 | Imidazolium-naphthalene diimide based | 34.8 nM                       | $5.85 \times 10^4 \text{ M}^{-1}$ |
| 7     | <i>New J. Chem</i> , 2022, <b>46</b> , 16907-16913                            | Pyrazinium-based                      | 11.6 nM                       | $3.8 \times 10^4 \text{ M}^{-1}$  |

Table S7: A comparison of literature reported Chemosensors for SO<sub>3</sub><sup>2-</sup> detection

| S. No | Publication                                                | Material used              | Detection Limit             | S-V constant                      | Medium used                          | Colorimetric/Fluorometric     |
|-------|------------------------------------------------------------|----------------------------|-----------------------------|-----------------------------------|--------------------------------------|-------------------------------|
| 1     | Present Study                                              | Pyrazinium-based           | 31 nM                       | $3.8 \times 10^5$ M <sup>-1</sup> | Aqueous medium                       | Colorimetric and fluorometric |
| 2     | <i>New J. Chem.</i> , 2017, <b>41</b> , 10096              | Pyrazoline-based           | 7.56 mM for 4a, and 4.87 mM |                                   | HEPES/DMF                            | Colorimetric and fluorometric |
| 3     | <i>RSC Adv.</i> , 2015, <b>5</b> , 91863                   | BODIPy - based             | 6.4 μM                      |                                   | Aqueous medium                       | Colorimetric and fluorometric |
| 4     | <i>Sens. Actuators B Chem.</i> , <b>231</b> (2016) 752–758 | Naphthofluorescein-based   | 1.74 M.                     |                                   | DMSO-PBS buffer                      | Colorimetric and fluorometric |
| 5     | <i>Org. Biomol. Chem.</i> , 2014, <b>12</b> , 4637         | Coumarin-quinolinium based | $8.9 \times 10^{-8}$ M      |                                   | PBS buffer                           | Colorimetric and fluorometric |
| 6     | <i>J. Agric. Food Chem.</i> 2011, <b>59</b> , 11935–11939  | Boron-dipyrromethene-based | $5.8 \times 10^{-5}$ M      |                                   | H <sub>2</sub> O/DMSO solution (1:1) | Colorimetric and fluorometric |
| 7     | <i>Chem. Commun.</i> , 2020, <b>56</b> , 10549             | Fluorescein based          | 2.98 mM.                    |                                   | CH <sub>3</sub> CN/PBS buffer = 1/1, | Fluorometric                  |

### References

1. D. Prabha, D. Singh, P. Kumar and R. Gupta, *Inorg. Chem.*, 2021, **60**, 17889-17899.
2. N. Tripathi, P. Singh and S. Kumar, *New J. Chem.*, 2017, **41**, 8739-8747.
3. S. Hussain, A. H. Malik, M. A. Afroz and P. K. Iyer, *Chem. Commun.*, 2015, **51**, 7207-7210.
